# Supplementary material for: Up-modulation of PLC-β2 reduces the number and malignancy of triple-negative breast tumor cells with a CD133+/EpCAM+ phenotype: a promising target for preventing progression of TNBC
Source: PubMed Central journal article supplement (PMC5584040; doi:10.1186/s12885-017-3592-y), 2017-09-04

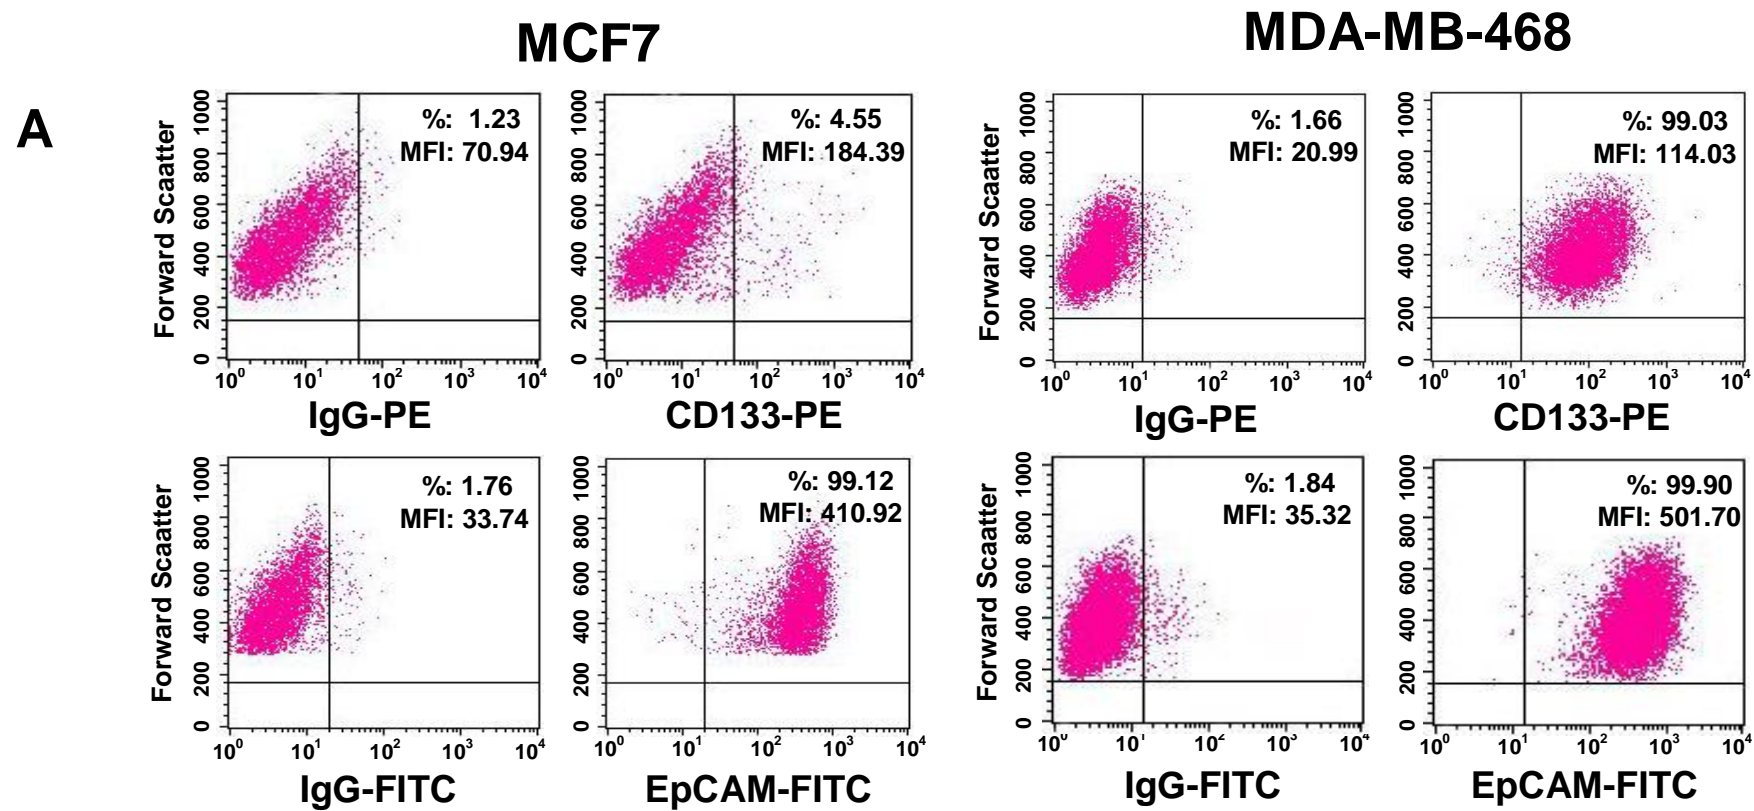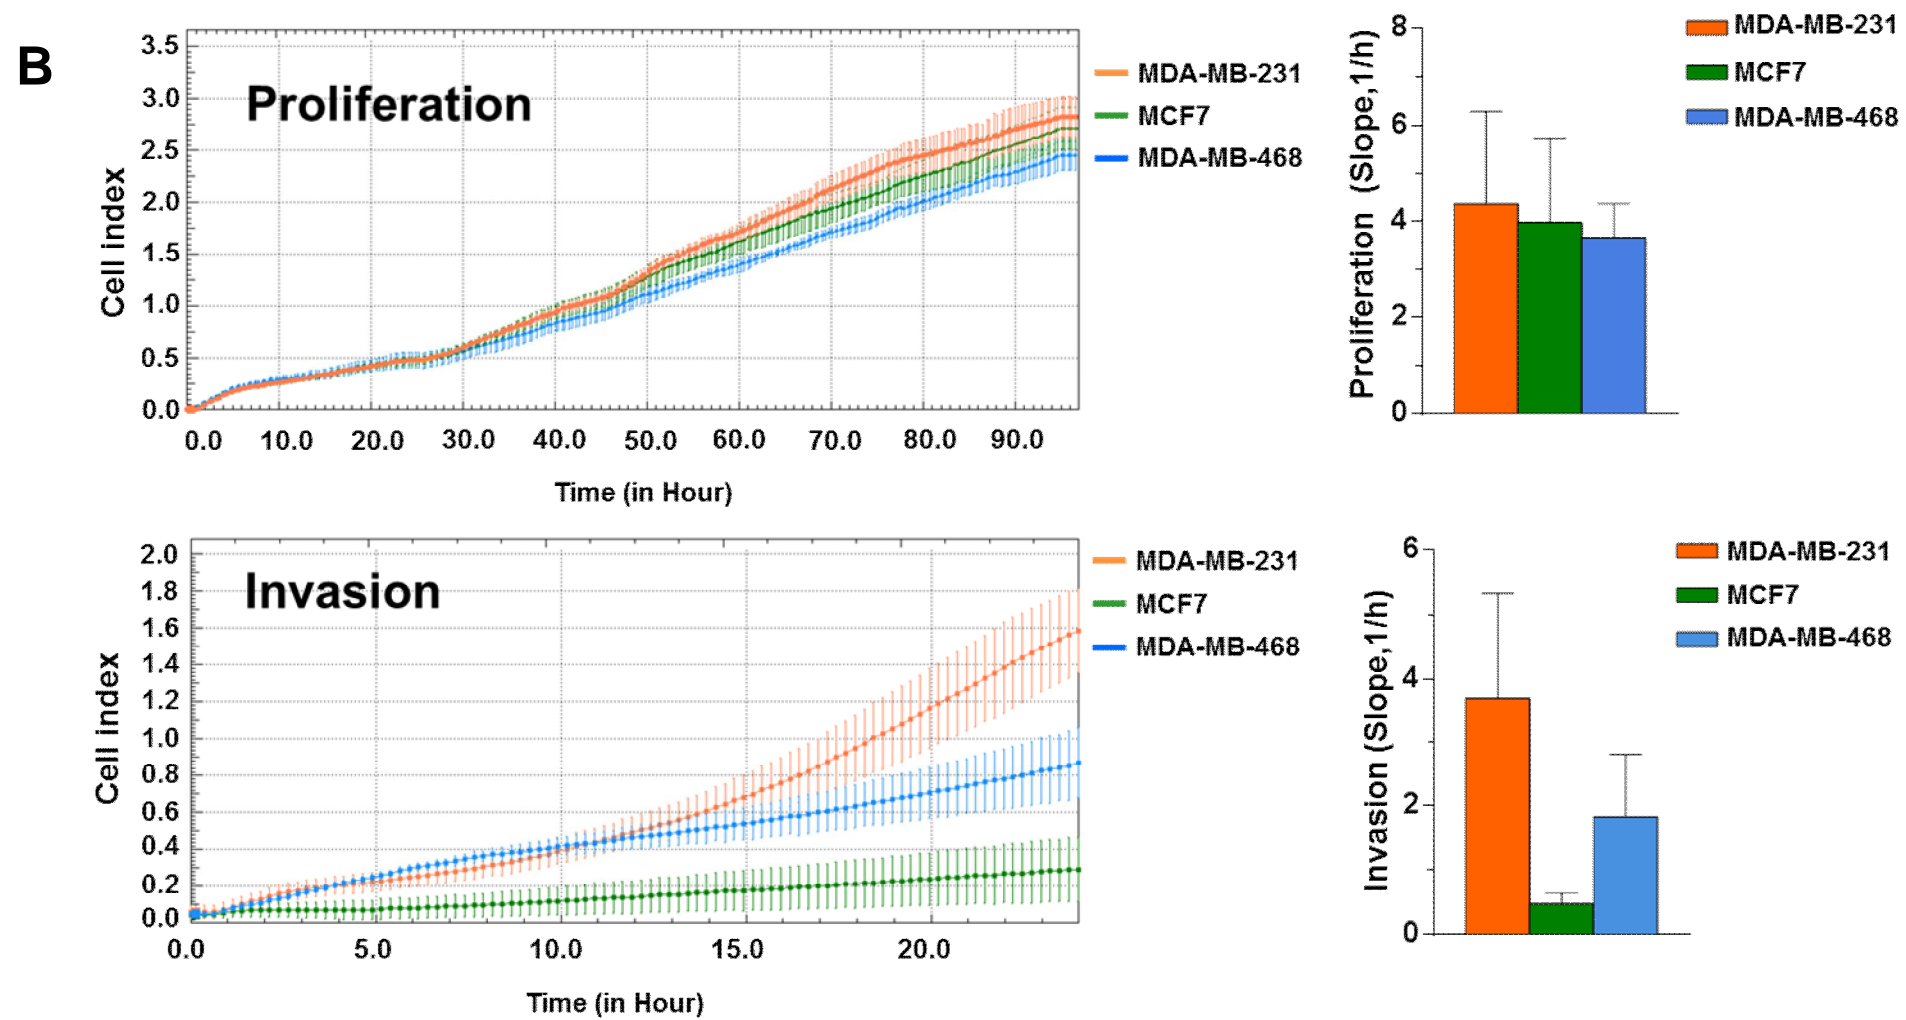

Supplement: 12885_2017_3592_MOESM1_ESM.pdf [file 12885_2017_3592_MOESM1_ESM.pdf]
